# Supplementary material for: Anemoside B4 alleviates DSS-induced colitis by inhibiting CD1d-dependent NLRP3 inflammasome activation in macrophages
Source: Research Square preprint supplement (doi:10.21203/rs.3.rs-4382137/v1), 2024-07-18
Supplement: Supplementary file 1 [file c413ac6a90ecba920b9a1d7d.docx]

**Supporting Information**


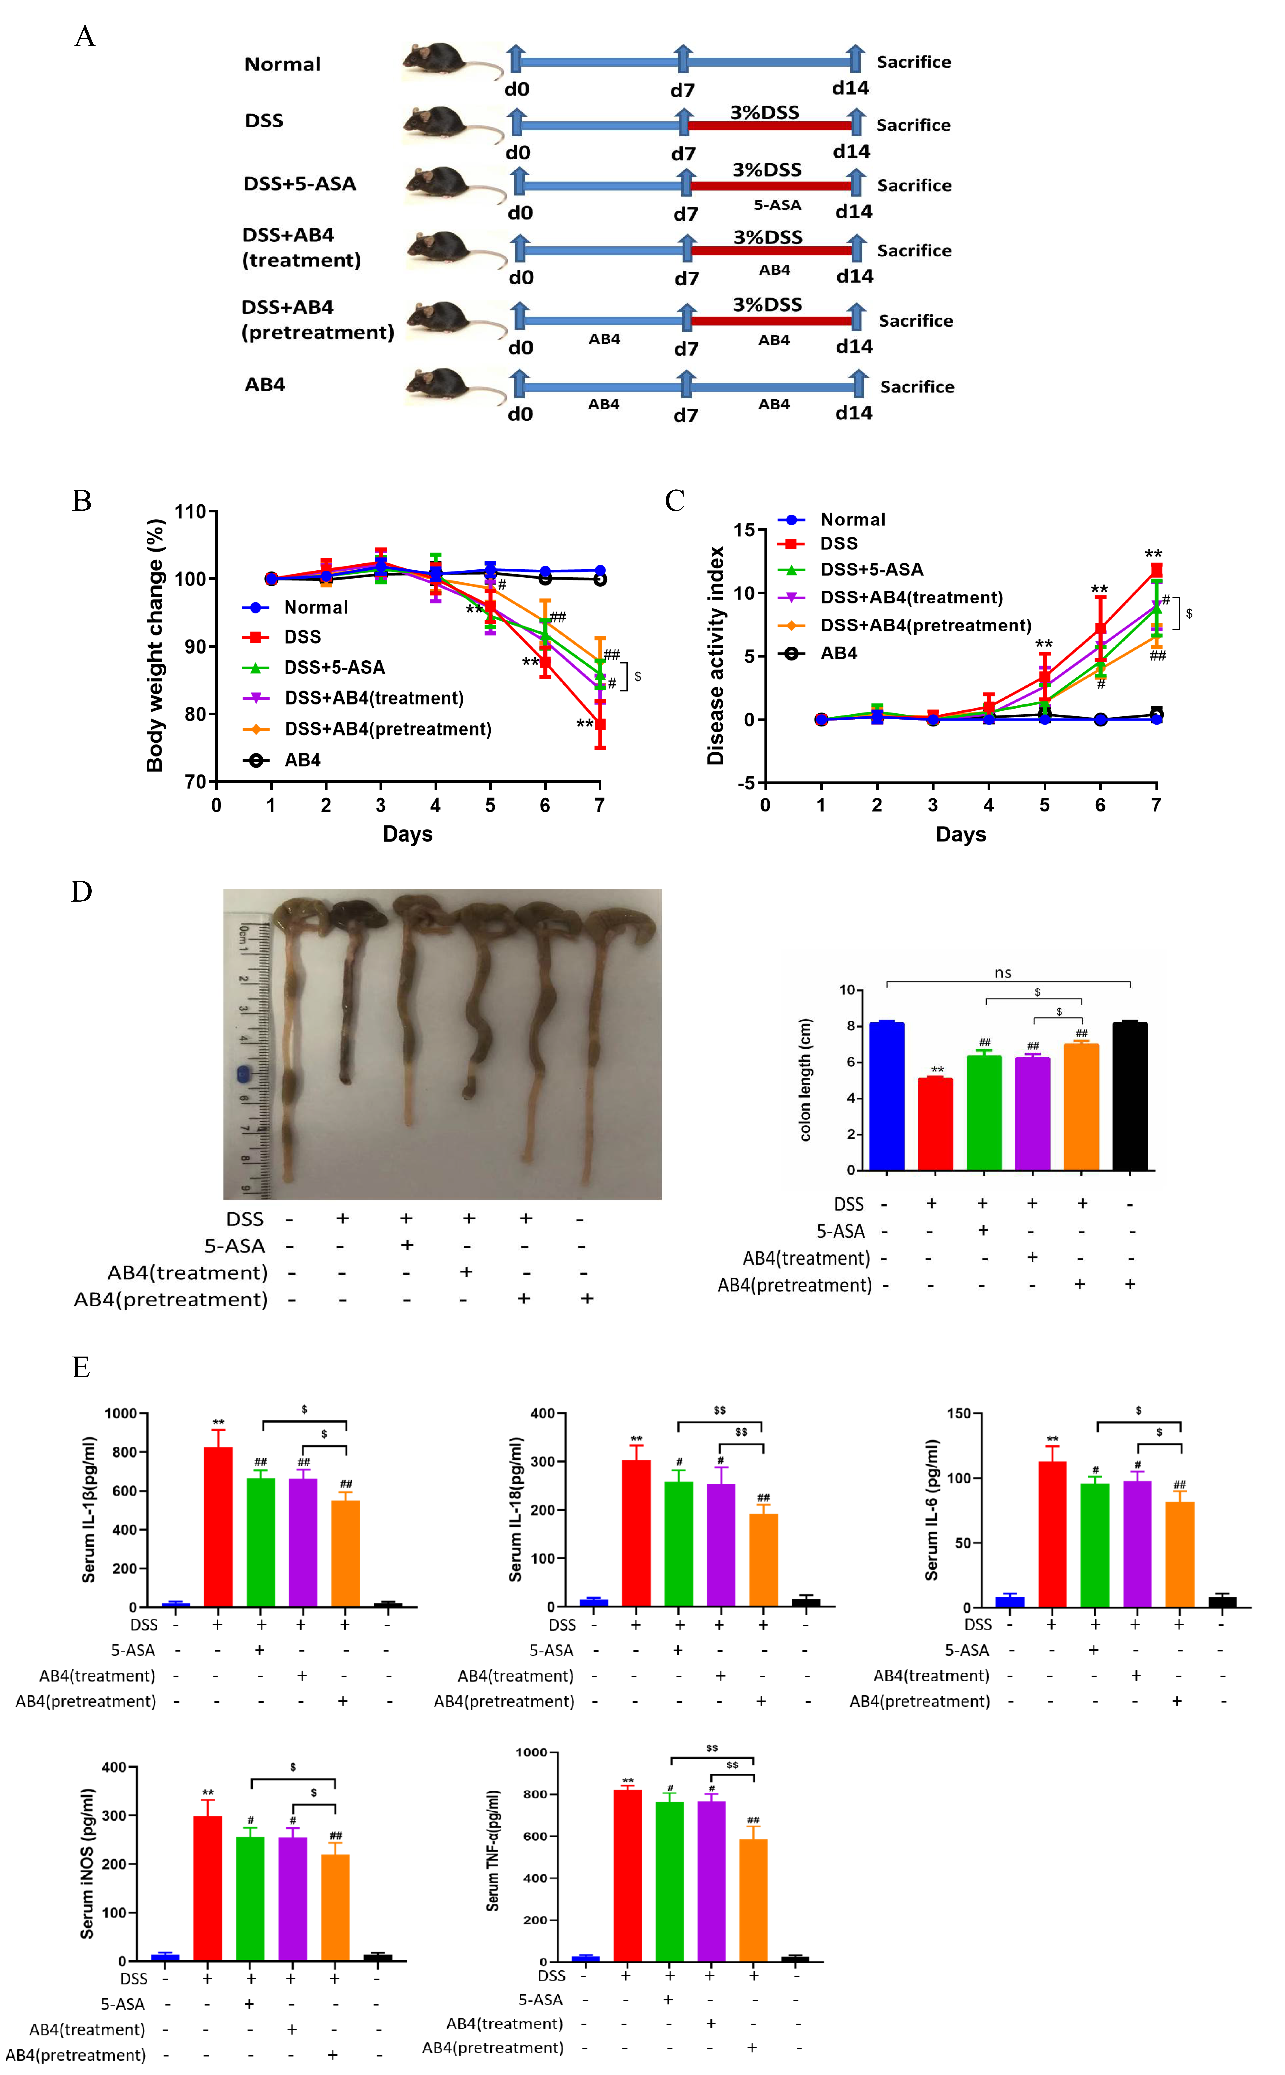
**Figure S1.** C57BL/6 mice in the AB4 pretreatment group were intraperitoneally injected with AB4 (5 mg/kg) for 7 days, and then given 3.0% DSS in drinking water for 7 days, during which AB4 (5 mg/kg) was continuously injected intraperitoneally; mice in the AB4 treatment group were given 3.0% DSS in drinking water for 7 days, during which AB4 (5 mg/kg) was intraperitoneally injected; 5-ASA (200 mg/kg) was orally administrated daily for 7 days as a positive control (n = 6 per group) (**A**). At the end of the experiment, the mice were sacrificed, and the colons were collected. (**B**) The body weight change, (**C**) DAI score, and (**D**) the colon length were measured. (**E**) Production of IL-1β, IL-18, IL-6, iNOS, and TNF-α in the serum of DSS-induced colitis mice was determined by ELISA. Data are presented as mean ± SD. ***P < 0.01* and ns, not significantly different *vs.* Normal group; *#P < 0.05, ##P < 0.01 vs.* DSS group; *$P < 0.05, $$P < 0.01* AB4 pretreatment group *vs.* 5-ASA group or AB4 treatment group.


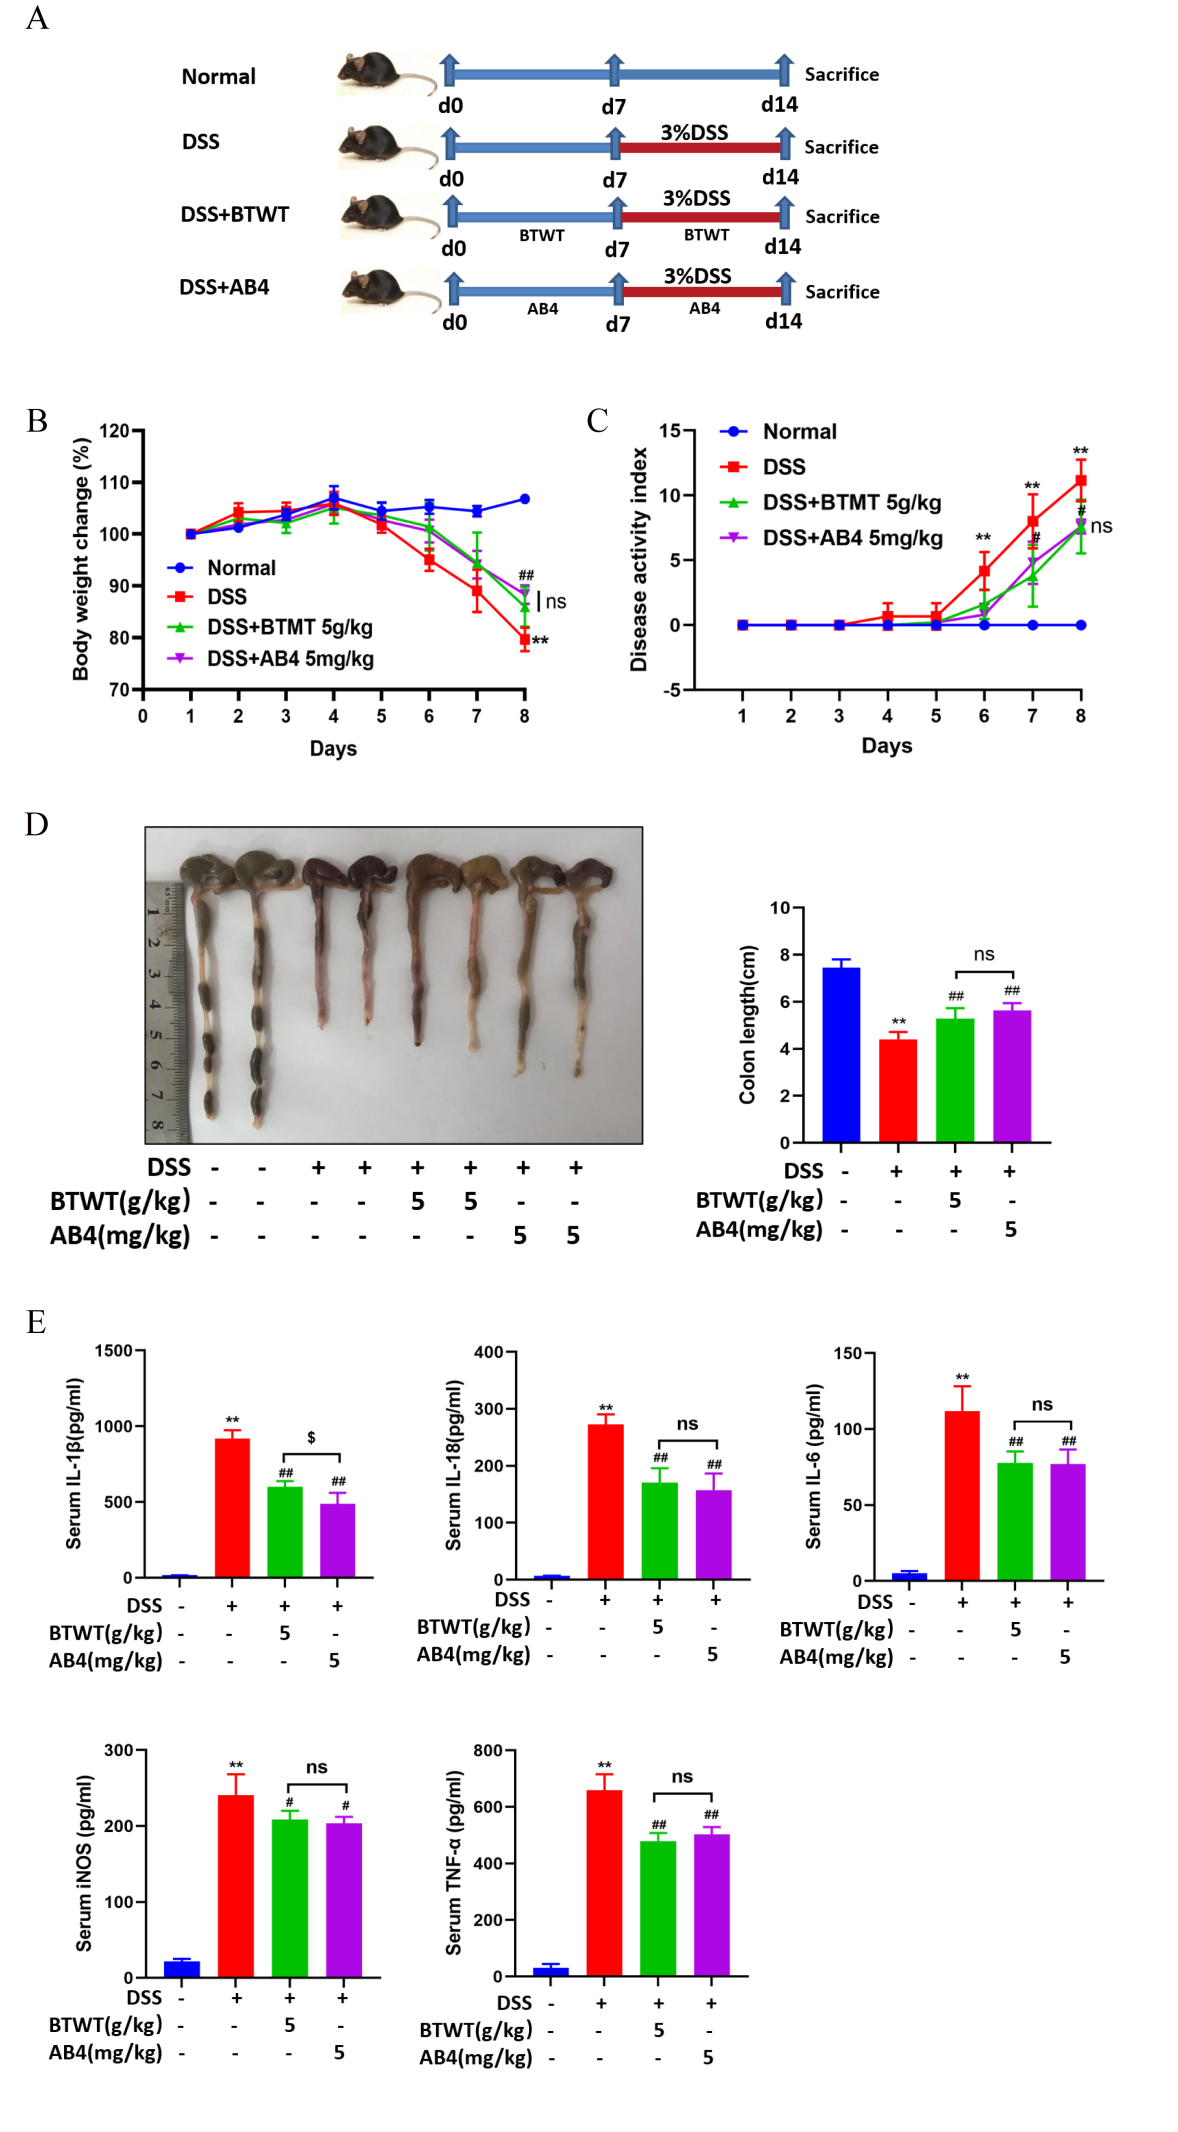


**Figure S2.** C57BL/6 mice in the AB4 group were intraperitoneally injected with AB4 (5 mg/kg) for 7 days, and then given 3.0% DSS in drinking water for 7 days, during which AB4 (5 mg/kg) was continuously injected intraperitoneally; mice in the BTWT group were orally administrated BTWT (5 g/kg) for 7 days, and then given 3.0% DSS in drinking water for 7 days, during which BTWT (5 g/kg) was orally administrated (n= 6 per group) (**A**). At the end of the experiment, the mice were sacrificed, and the colons were collected. (**B**) The body weight change, (**C**) DAI score, and (**D**) the colon length were measured. (**E**) Production of IL-1β, IL-18, IL-6, iNOS, and TNF-α in the serum of DSS-induced colitis mice was determined by ELISA. Data are presented as mean ± SD. ***P < 0.01 vs.* Normal group; *#P < 0.05, ##P < 0.01 vs.* DSS group; ns, not significantly different AB4 treatment group *vs.* BTWT treatment group; *$P < 0.05* AB4 treatment group *vs.* BTWT treatment group.


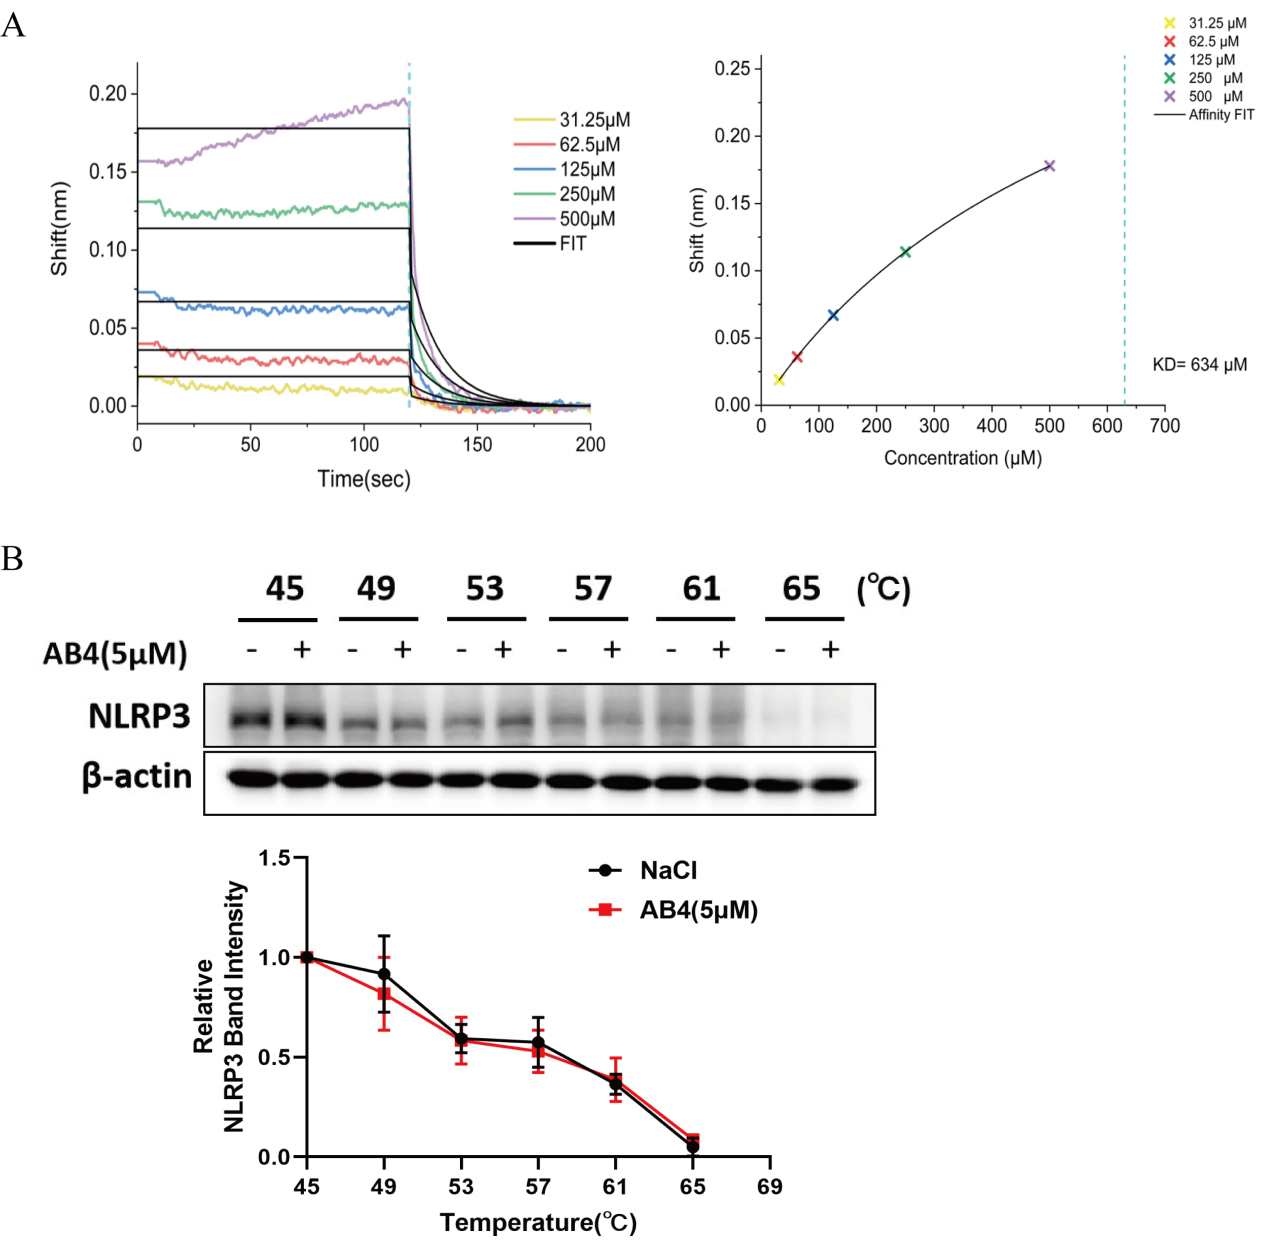


**Figure S3.** Interaction of NLRP3 with AB4. (**A**) BLI to determine the binding affinity (KD value) of the NLRP3 protein with AB4. The concentrations of AB4 were set to 31.25, 62.5, 125, 250, and 500 μM. (**B**) CETSA of the NLRP3 protein with AB4. Data are presented as mean ± SD.


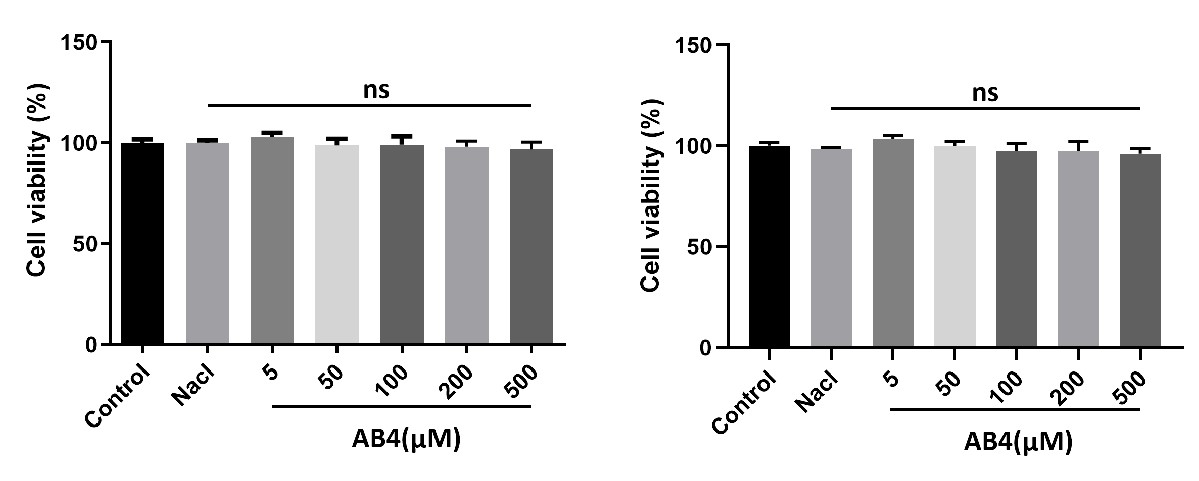


**Figure S4.** BMDMs (**A**)andTHP-1 (**B**) cells were treated with different concentrations of AB4 for 24 h, and cell viability was assessed by CCK-8 assay . Data are presented as mean ± SD.ns, not significantly different *vs.* Control group.

**
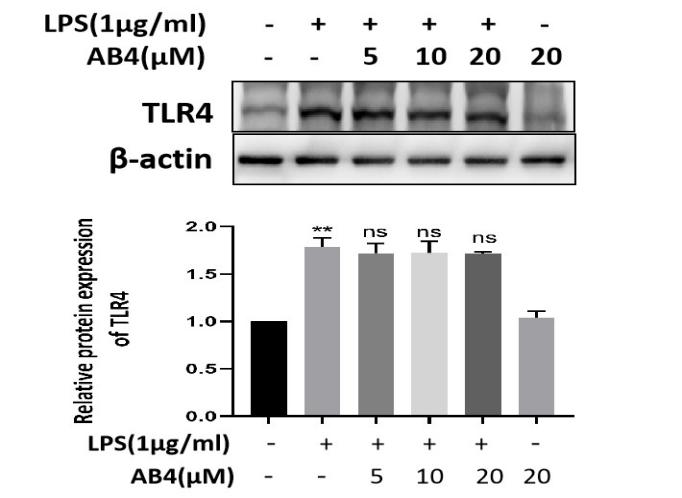
**

**Figure S5.** BMDMs were pretreated with AB4 (5, 10, and 20 μM) for 4 h, and then cultured with LPS (1μg/ml) for 6 h. The protein of TLR4 was detected by Western Blot. Data are presented as mean ± SD. ***P < 0.01 vs.* Control group;ns, not significantly different *vs.* LPS group.


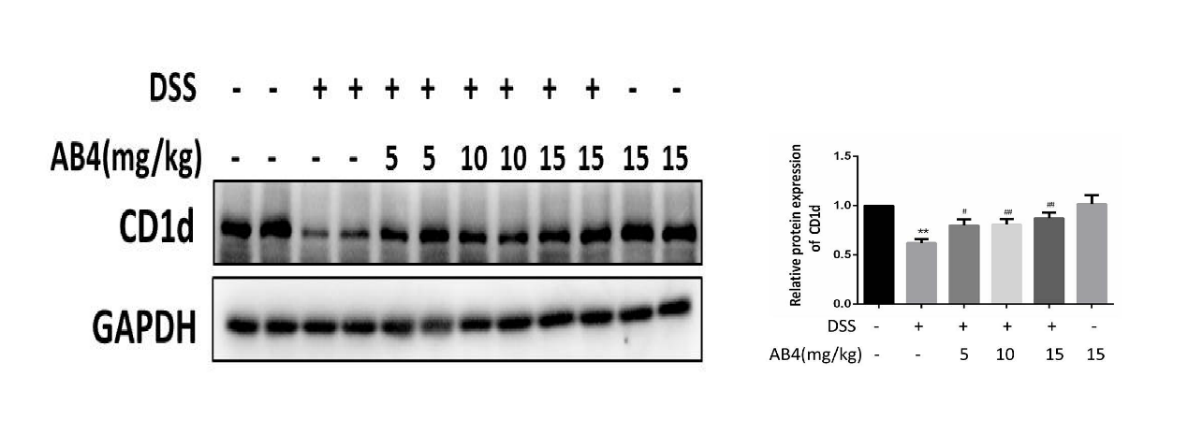


**Figure S6.** WT mice were subjected to DSS-induced colitis. The protein expression of CD1d in colonic homogenates was detected by Western Blot. Data are presented as mean ± SD. ***P < 0.01 vs.* Normal group; *#P < 0.05, ##P < 0.01* *vs.* DSS group.
